# Supplementary material
Source: PubMed Central journal article supplement (PMC1458662)
Supplement: pnas_0600625103_1.pdf [file pnas_0600625103_1.pdf]

## Supporting Information Table 1.

Natural variation in toxicity and conspicuousness among model-mimic pairs (*Epipedobates*–*Allobates*)

| Learning stimulus              | Toxicity (min) <sup>*</sup> | Relative toxicity <sup>†</sup> | Conspicuousness ( <i>E</i> ) <sup>‡</sup> | Relative conspicuousness <sup>*</sup> |
|--------------------------------|-----------------------------|--------------------------------|-------------------------------------------|---------------------------------------|
| <i>Epipedobates bilineatus</i> | 79.00 ± 3.189               | 0.60 ± 0.039                   | 2.46 ± 0.180                              | 1.00 ± 0.077                          |
| <i>Allobates zaparo</i> Y      | 4.80 ± 0.183                | 0.04 ± 0.002                   | 2.43 ± 0.260                              | 0.97 ± 0.104                          |
| <i>Epipedobates parvulus</i>   | 135.40 ± 9.312              | 1.00 ± 0.070                   | 1.45 ± 0.067                              | 0.58 ± 0.027                          |
| <i>Allobates zaparo</i> no Y   | 5.25 ± 0.391                | 0.03 ± 0.003                   | 1.30 ± 0.114                              | 0.52 ± 0.045                          |
| <i>Epipedobates hahneli</i>    | 68.20 ± 2.935               | 0.51 ± 0.022                   | 1.16 ± 0.139                              | 0.46 ± 0.056                          |
| <i>Allobates femoralis</i>     | 4.80 ± 0.342                | 0.04 ± 0.002                   | 1.16 ± 0.111                              | 0.46 ± 0.044                          |

All data are mean ± SE.

<sup>\*</sup> Toxicity is measured in time (minutes) to recovery from subcutaneous injection of frog skin extract into laboratory mice.

<sup>†</sup> Relative toxicity and conspicuousness are scaled to a maximum of 1.00.

<sup>‡</sup> Conspicuousness is measured as the Euclidean distance ( $E = \sqrt{\Delta S^2 + \Delta L^2}$ ) of color ( $\Delta S$ ) and brightness ( $\Delta L$ ) contrast of weighted dorsal coloration to side coloration (internal contrast).
